# Supplementary material for: Structural basis for Parkinson’s disease-linked LRRK2’s binding to microtubules
Source: PubMed Central journal article supplement (PMC9758056; doi:10.1038/s41594-022-00863-y), 2022-12-12
Supplement: 41594_2022_863_MOESM1_ESM.pdf [file 41594_2022_863_MOESM1_ESM.pdf]

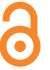

---

# Structural basis for Parkinson's disease-linked LRRK2's binding to microtubules

---

In the format provided by the authors and unedited

| Filament Type                           | Rotation (°) | Z-rise (Å) |
|-----------------------------------------|--------------|------------|
| LRRK2 <sup>FL</sup> /11-pf <sup>1</sup> | 33.3         | 31.5       |
| LRRK2 <sup>FL</sup> /12-pf <sup>1</sup> | 30.3         | 28.8       |
| LRRK2 <sup>RCKW</sup> /11-pf (Class 1)  | 33.4         | 33.3       |
| LRRK2 <sup>RCKW</sup> /11-pf (Class 2)  | 32.5         | 33.6       |
| LRRK2 <sup>RCKW</sup> /11-pf (Class 3)  | 33.4         | 33.9       |
| LRRK2 <sup>RCKW</sup> /11-pf (Class 4)  | 33.4         | 32.0       |
| LRRK2 <sup>RCKW</sup> /12-pf (Class 1)  | 30.4         | 30.8       |
| LRRK2 <sup>RCKW</sup> /12-pf (Class 2)  | 30.4         | 31.2       |

**Supplementary Table 1 | Parameters observed for in vitro reconstituted LRRK2<sup>RCKW</sup> filaments (this work) compared to published full-length LRRK2 filaments in cells**

#### **Supplementary Material Reference**

1. Watanabe, R. *et al.* The In Situ Structure of Parkinson's Disease-Linked LRRK2. *Cell* **182**, 1508-1518.e16 (2020).
