# Supplementary material for: Structural basis for Parkinson’s disease-linked LRRK2’s binding to microtubules
Source: PubMed Central journal article supplement (PMC9758056; doi:10.1038/s41594-022-00863-y), 2022-12-12

Source Data: Western Blots and Gels

Extended Data Figure 4c,d

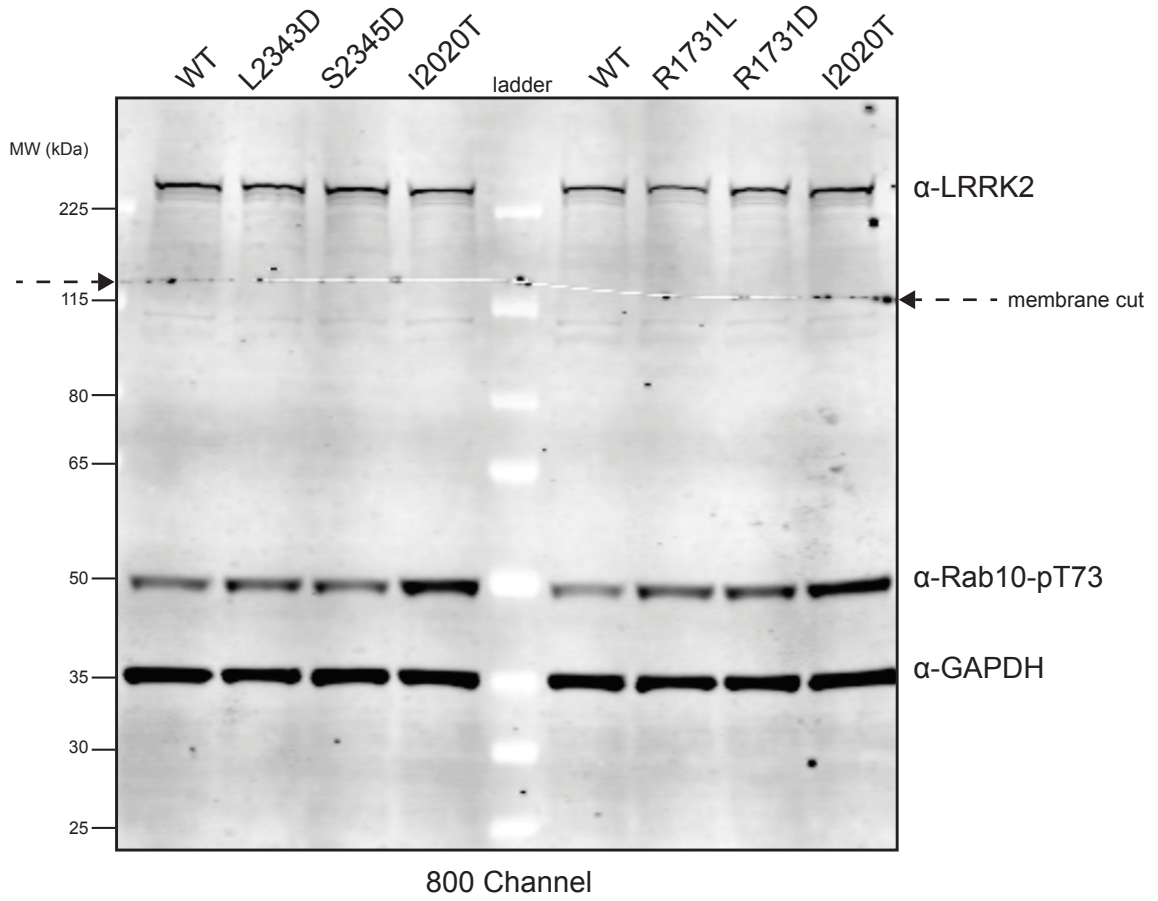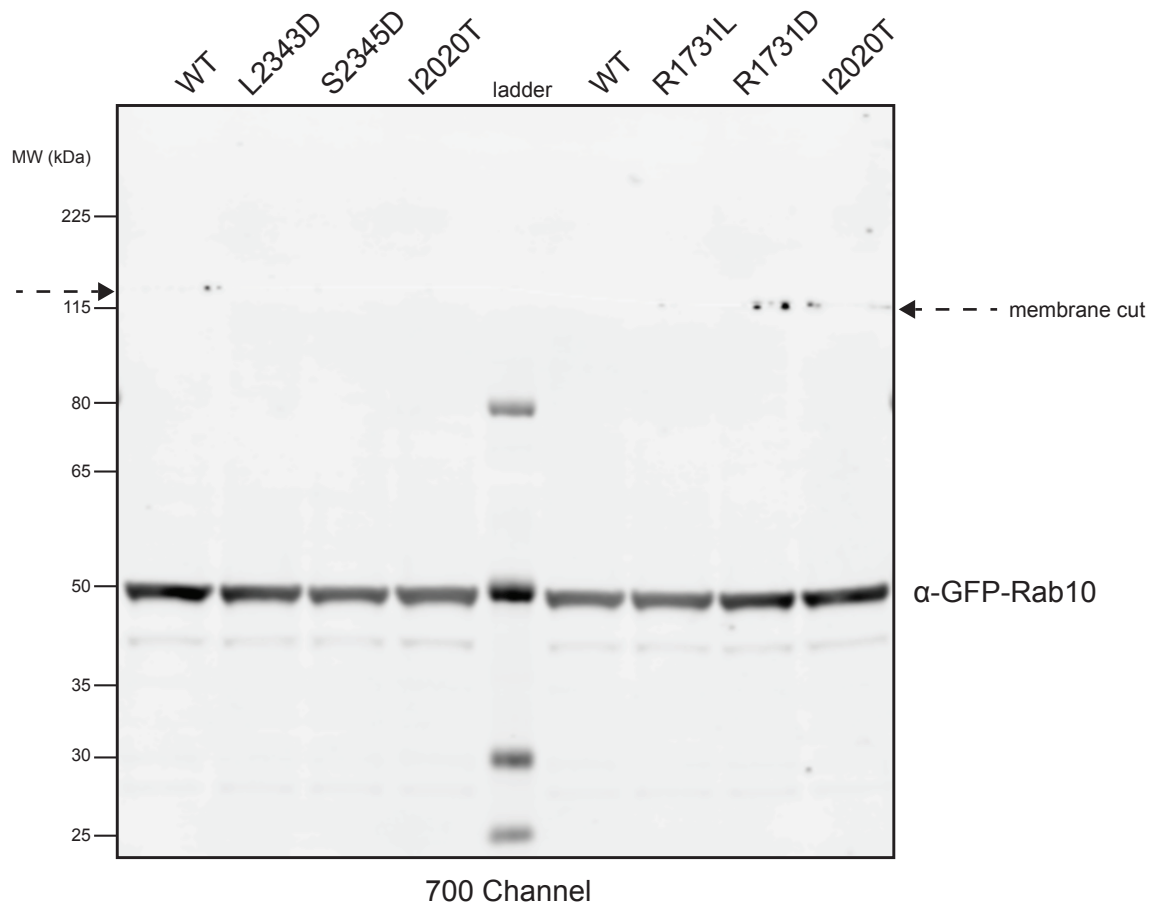

# Source Data: Western Blots and Gels

## Extended Data Figure 4e

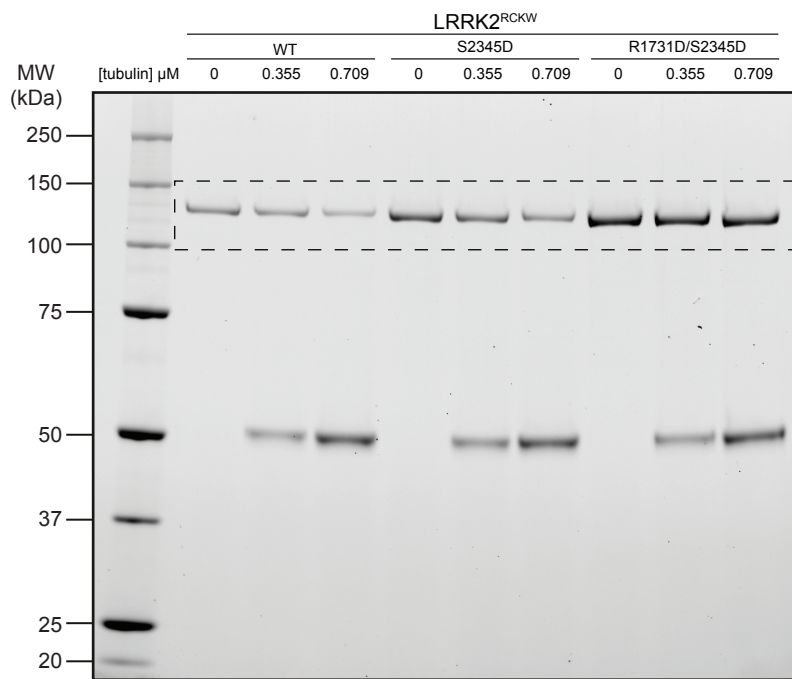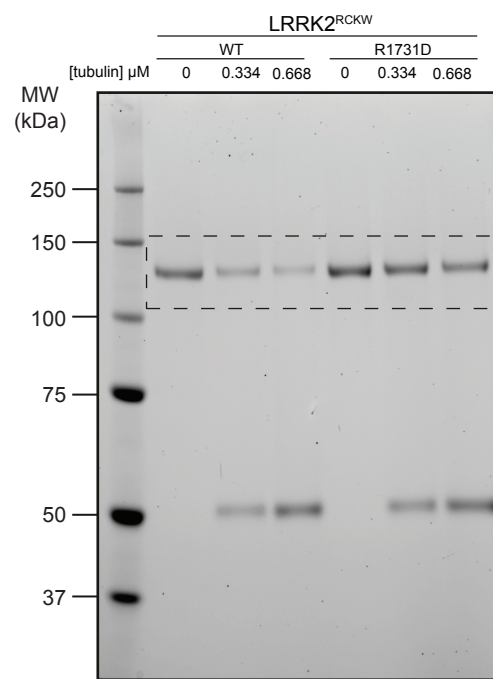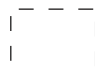

Dashed Box represents the sections presented in the figure

# Source Data: Western Blots and Gels

## Extended Data Figure 4i

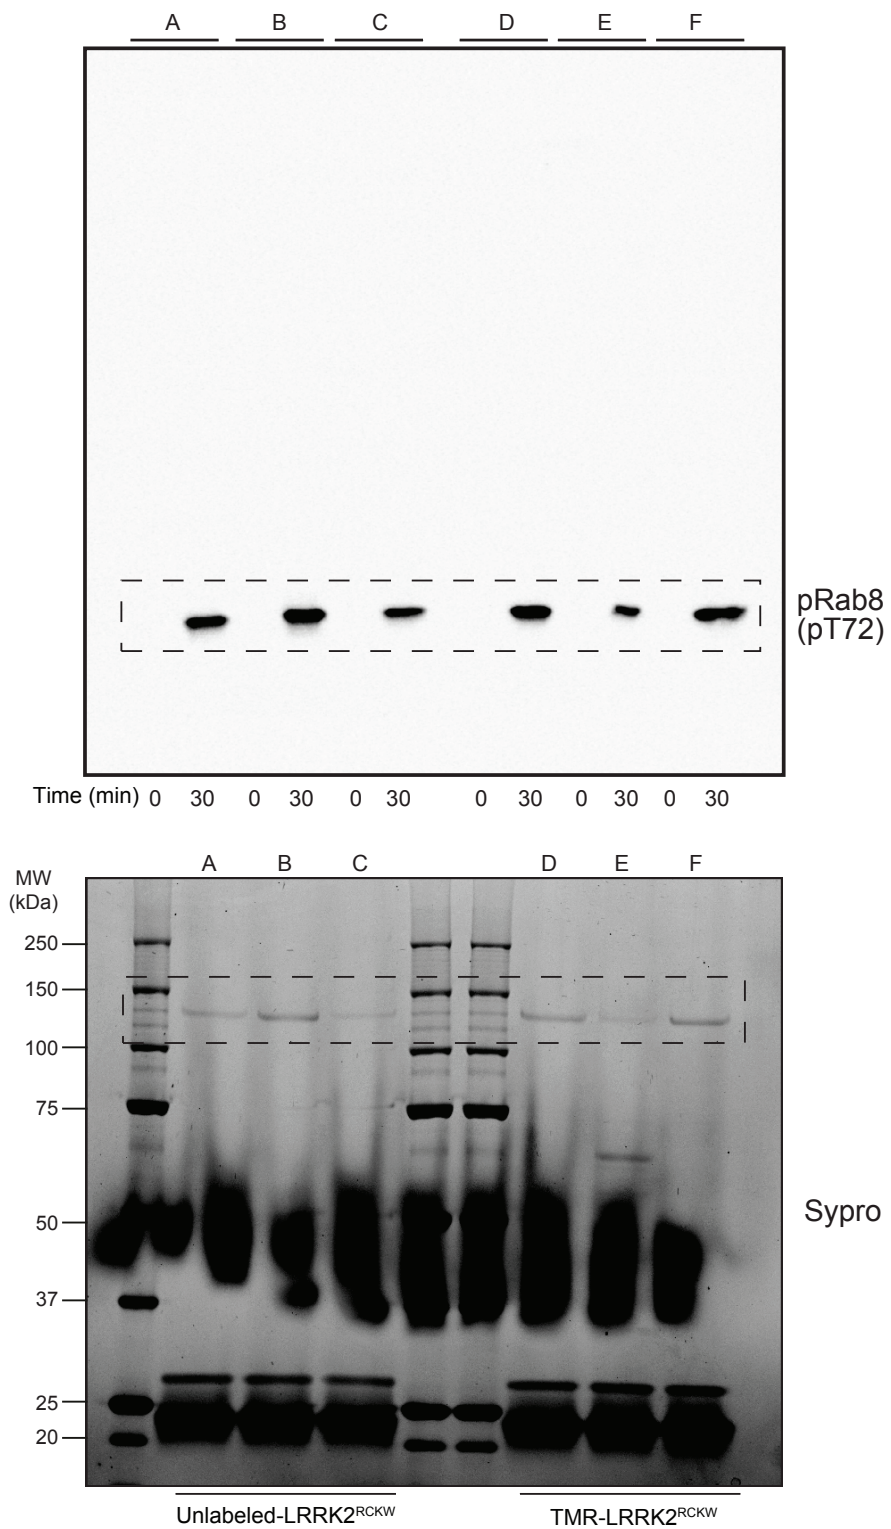

Dashed Box represents the sections presented in the figure

# Source Data: Western Blots and Gels

## Extended Data Figure 4I

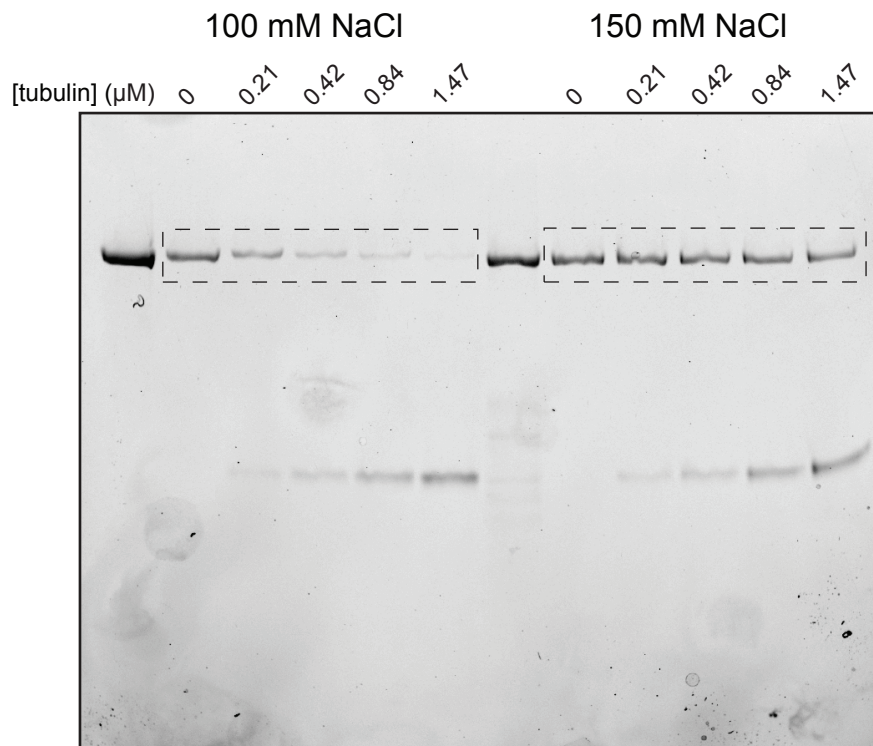

Supplement: 41594_2022_863_MOESM9_ESM.pdf [file 41594_2022_863_MOESM9_ESM.pdf]
