# Supplementary material for: Structural basis for Parkinson’s disease-linked LRRK2’s binding to microtubules
Source: PubMed Central journal article supplement (PMC9758056; doi:10.1038/s41594-022-00863-y), 2022-12-12

# Source Data: Western Blots and Gels

## Extended Data Figure 5b

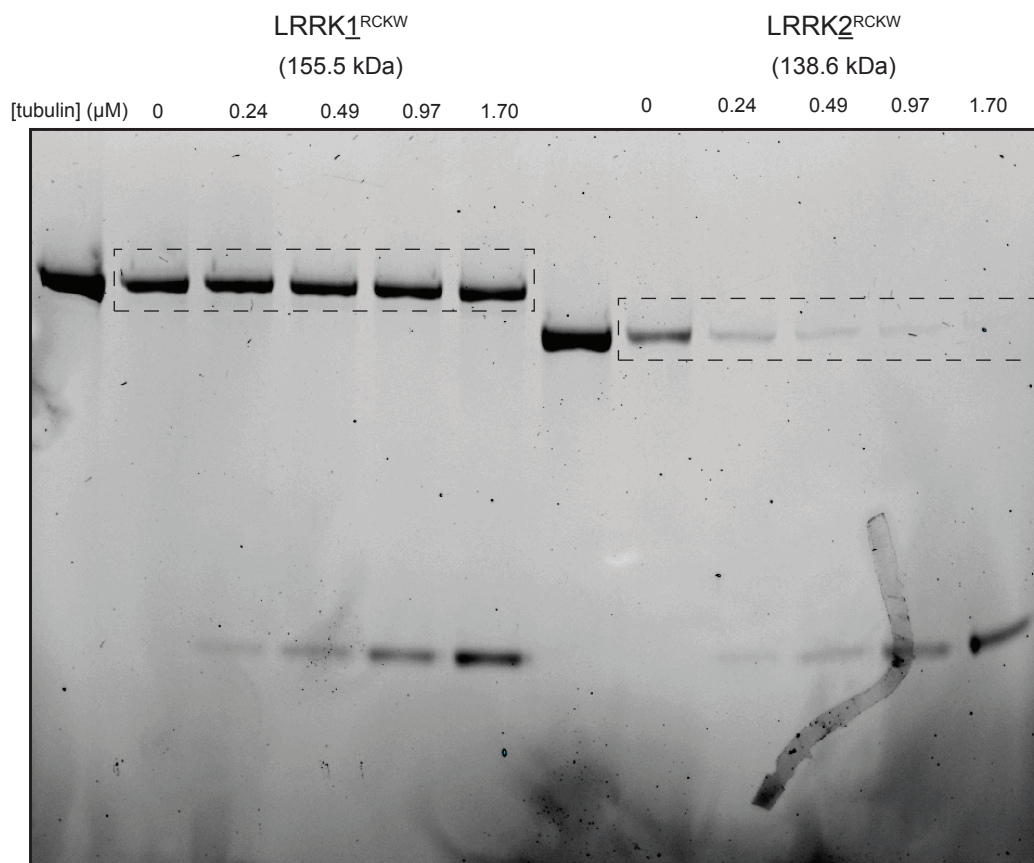

 Dashed Box represents the sections presented in the figure

Source Data: Western Blots and Gels

Extended Data Figure 5i

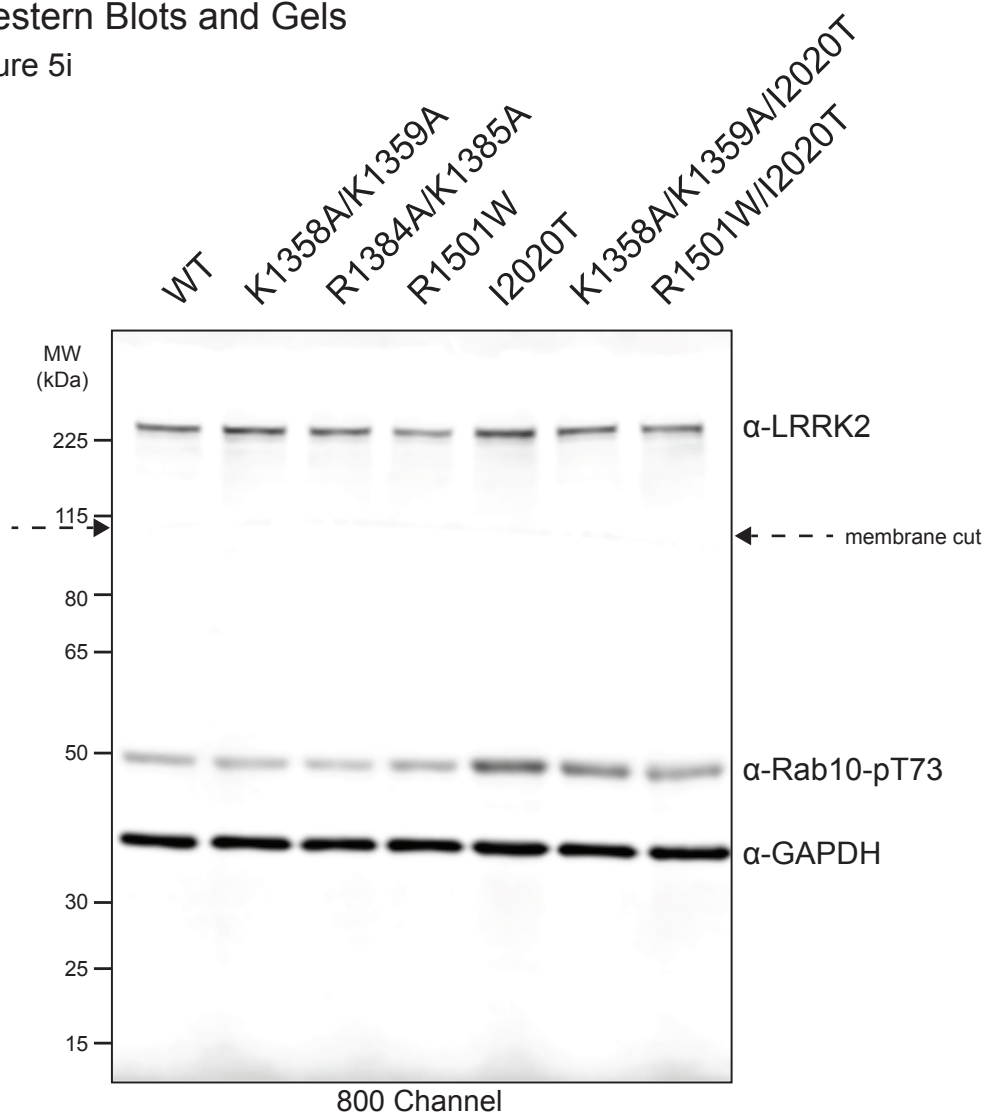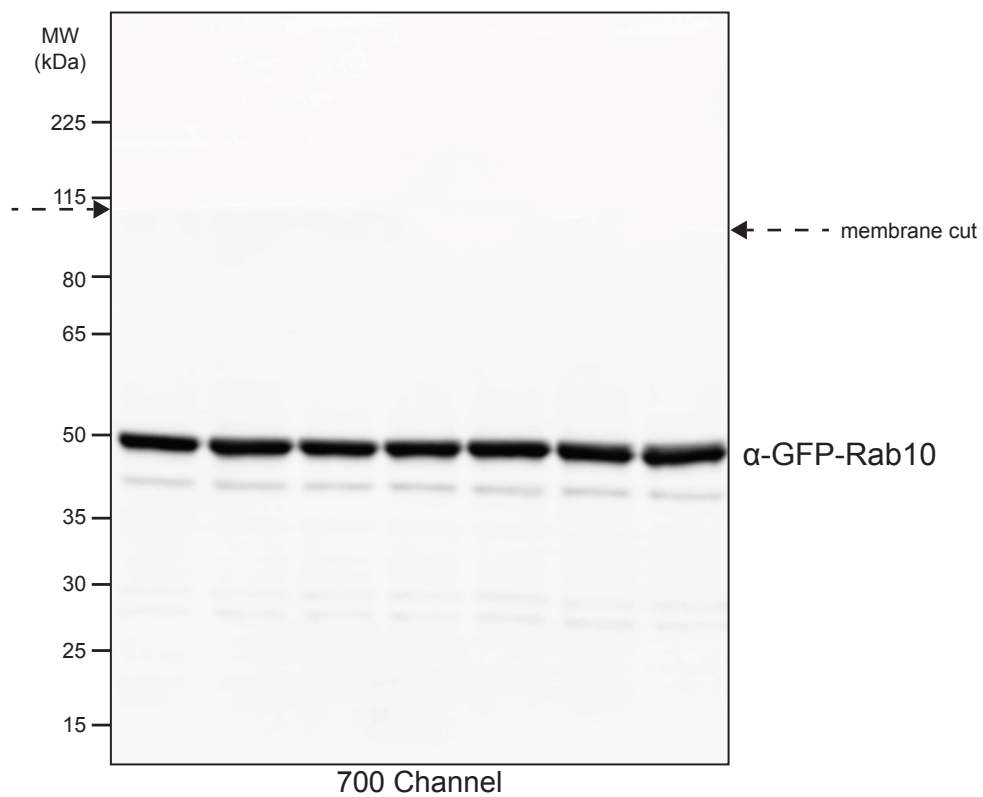

Supplement: 41594_2022_863_MOESM11_ESM.pdf [file 41594_2022_863_MOESM11_ESM.pdf]
